# Supplementary material for: ATP8B1-mediated spatial organization of Cdc42 signaling maintains singularity during enterocyte polarization
Source: PubMed Central journal article supplement — J Cell Biol. 2015 Sep 28;210(7):1055–63. doi: 10.1083/jcb.201505118 (PMC4586737; doi:10.1083/jcb.201505118), 2015-09-28
Supplement: supp_jcb.201505118_JCB_201505118_sm.pdf [file supp_jcb.201505118_JCB_201505118_sm.pdf]

Bruurs et al., <http://www.jcb.org/cgi/content/full/jcb.201505118/DC1>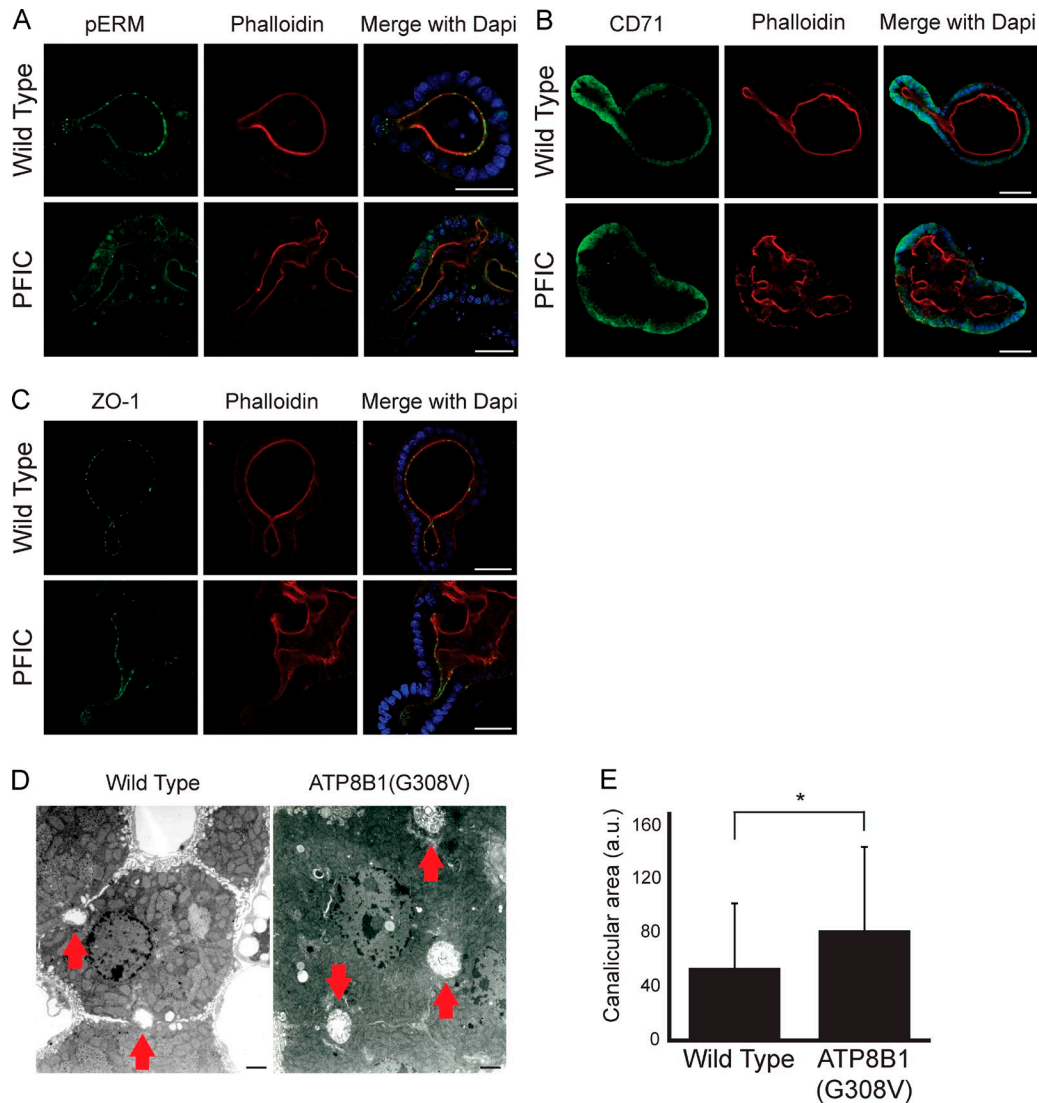

Figure S1. **ATP8B1 mutations affect lumen morphology in the intestine and liver.** (A–C) Localization of the apical marker pERM (A), basolateral marker CD71 (B), and apical tight junction marker ZO-1 (C) in WT and PFIC organoids. (D) Transmission electron micrographs of liver sections from WT or *ATP8B1*<sup>G308V/G308V</sup> mice. Red arrows highlight bile canaliculi. (E) Quantification of bile canaliculus lumen size in WT or *ATP8B1*<sup>G308V/G308V</sup> mice. WT  $n = 138$ , *ATP8B1*<sup>G308V/G308V</sup>  $n = 146$  (total number of canaliculi from two different mice per genotype). Error bars are SD. \*,  $P < 0.00003$ . Bars: (A–C) 35  $\mu\text{m}$ ; (D) 500 nm.

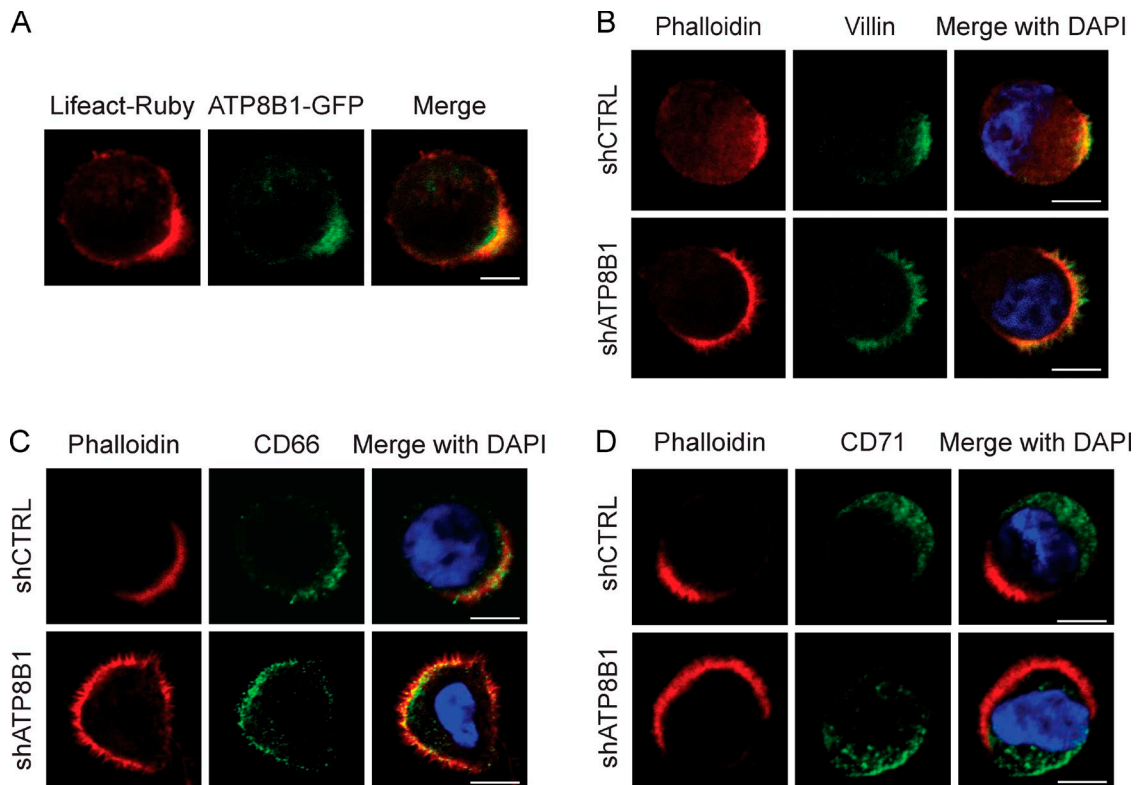

Figure S2. **Polarity markers distribute normally in ATP8B1-depleted W4 cells.** (A) W4 cell expressing ATP8B1-GFP and the actin marker Lifeact-Ruby. (B) Control or ATP8B1-depleted W4 cells immunostained for the brush border marker villin. (C and D) Immunofluorescence staining in polarized control or ATP8B1-depleted W4 cells demonstrates normal segregation of apical and basolateral markers (CD66 [C] and CD71 [D], respectively). Bars, 5  $\mu$ m.

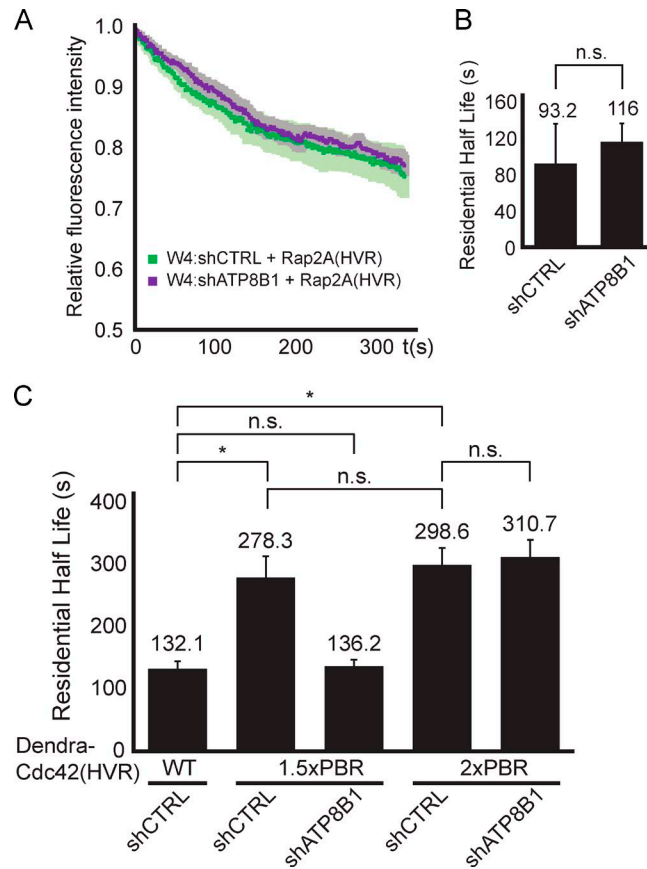

Figure S3. **ATP8B1 knockdown does not affect apical membrane diffusion of Dendra-Rap2A(HVR).** (A) Mean normalized dissociation traces for control ( $n = 9$ ) or ATP8B1-depleted ( $n = 9$ ) W4 cells expressing Dendra-Rap2A(HVR). Light areas indicate SEM. (B) Residential half-lives determined from mean decay traces shown in A using curve fitting. Statistics were performed using the half-lives from individual cell traces. Error bars represent SEM. n.s.,  $P > 0.05$ . (C) Residential half-lives determined from mean decay traces shown in Fig. 5 E using curve fitting. Statistics were performed using the half-lives from individual cell traces. Error bars represent SEM. \*,  $P < 0.02$ ; n.s.,  $P > 0.05$ .
